# Supplementary material for: Early Effects of HTLV-1 Infection on the Activation, Exhaustion, and Differentiation of T-Cells in Humanized NSG Mice
Source: MDPI journal article supplement (doi:10.3390/cells10102514), 2021-09-23
Supplement: s1 [file s1]

**Table S1. Lymphoproliferation in HTLV-1-infected HIS-NSG mice.**

| Mouse ID            | Normalized HTLV-1 PVL<br>(% HTLV-1 <sup>+</sup> cells in CD3 <sup>+</sup> cells) |        | CD3 <sup>+</sup> cells (%) |        | CD4 <sup>+</sup> CD25 <sup>+</sup> cells (%) |        | Spleen weight (mg) |
|---------------------|----------------------------------------------------------------------------------|--------|----------------------------|--------|----------------------------------------------|--------|--------------------|
|                     | Blood                                                                            | Spleen | Blood                      | Spleen | Blood                                        | Spleen |                    |
| <b>30 days p.i.</b> |                                                                                  |        |                            |        |                                              |        |                    |
| B1_F_LK             | 48.19                                                                            | 41.79  | 44.60                      | 29.60  | 58.98                                        | 60.08  | 211.0              |
| B1_F_LT             | 1.38                                                                             | 1.36   | 40.70                      | 19.30  | 53.34                                        | 45.86  | 197.4              |
| B1_F_NO             | 15.98                                                                            | 8.40   | 44.30                      | 26.90  | 52.95                                        | 58.31  | 196.8              |
| B1_F_RT             | 18.17                                                                            | 34.55  | 36.30                      | 15.40  | 35.87                                        | 31.33  | 125.0              |
| D1_F_RK             | 7.52                                                                             | 21.30  | 76.60                      | 56.80  | 71.06                                        | 69.30  | 203.3              |
| D1_F_TT             | 9.58                                                                             | 15.00  | 61.60                      | 44.50  | 72.43                                        | 74.58  | 204.2              |
| D1_F_LK             | 25.69                                                                            | 12.10  | 31.00                      | 50.00  | -                                            | 30.85  | 252.9              |
| D1_F_RT             | 43.72                                                                            | 10.26  | 33.70                      | 23.20  | -                                            | 35.01  | 157.7              |
| <b>60 days p.i.</b> |                                                                                  |        |                            |        |                                              |        |                    |
| B2_F_TT             | 20.89                                                                            | 31.88  | 45.80                      | 23.90  | 67.07                                        | 54.5   | 121.3              |
| D2_F_NO*            | 63.77                                                                            | 44.68  | 77.30                      | 65.00  | 89.92                                        | 78.59  | 378.8              |
| D2_F_TT*            | 72.69                                                                            | 70.60  | 96.40                      | 90.30  | 95.94                                        | 90.00  | 322.6              |
| D2_M_NO*            | 69.81                                                                            | 62.96  | 88.50                      | 82.90  | 91.04                                        | 87.14  | 227.3              |
| D2_F_RT             | 62.06                                                                            | 28.69  | 48.70                      | 23.10  | 83.64                                        | 75.61  | 65.1               |
| D2_F_LT             | 26.51                                                                            | 17.56  | 33.30                      | 19.90  | 71.72                                        | 74.14  | 104.0              |

HIS-NSG mice were infected with HTLV-1. After 30 days and 60 days post-infection, blood and spleen were collected. HTLV-1 proviral load (PVL) was determined by quantitative PCR in total DNA and then normalized by the frequency of human T-cells (CD3<sup>+</sup> cells). The frequency of T-cells was determined within human leukocytes (CD45<sup>+</sup> cells), and the frequency of CD25<sup>+</sup> cells is shown within CD4<sup>+</sup> T-cells, as defined by flow cytometry. Spleen weight is shown in milligrams (mg). \*Mice with splenomegaly and augmented lymphoproliferation.

**Table S2. Expression of chemokine receptors in CD4<sup>+</sup> T-cells.**

| Time            | Sample | Subsets          | Groups        |                | <i>p</i> -value <sup>a</sup> | <i>p</i> -value <sup>b</sup> | <i>p</i> -value <sup>c</sup> |
|-----------------|--------|------------------|---------------|----------------|------------------------------|------------------------------|------------------------------|
|                 |        |                  | Control       | HTLV-1         |                              |                              |                              |
| 30 days<br>p.i. | Blood  | CXCR3–CCR4–CCR5– | 7.73 ± 2.91   | 5.36 ± 6.04    | 0.363                        | -                            | -                            |
|                 |        | CXCR3–CCR4+CCR5– | 59.74 ± 9.91  | 15.46 ± 12.20  | <b>&lt;0.001</b>             | -                            | -                            |
|                 |        | CXCR3+CCR4–CCR5– | 0.43 ± 0.29   | 1.62 ± 1.30    | <b>0.036</b>                 | -                            | -                            |
|                 |        | CXCR3–CCR4–CCR5+ | 0.91 ± 0.69   | 0.73 ± 1.17    | 0.722                        | -                            | -                            |
|                 |        | CXCR3+CCR4–CCR5+ | 0.45 ± 0.50   | 4.31 ± 2.27    | <b>0.002</b>                 | -                            | -                            |
|                 |        | CXCR3+CCR4+CCR5– | 13.29 ± 6.90  | 18.60 ± 8.17   | 0.200                        | -                            | -                            |
|                 |        | CXCR3–CCR4+CCR5+ | 10.55 ± 2.27  | 7.72 ± 9.06    | 0.419                        | -                            | -                            |
|                 |        | CXCR3+CCR4+CCR5+ | 6.93 ± 2.89   | 46.20 ± 18.29  | <b>&lt;0.001</b>             | -                            | -                            |
|                 | Spleen | CXCR3–CCR4–CCR5– | 9.94 ± 9.56   | 5.86 ± 4.96    | 0.094                        | -                            | -                            |
|                 |        | CXCR3–CCR4+CCR5– | 57.17 ± 10.32 | 18.51 ± 14.04  | <b>&lt;0.001</b>             | -                            | -                            |
|                 |        | CXCR3+CCR4–CCR5– | 1.69 ± 1.00   | 6.37 ± 2.32    | <b>&lt;0.001</b>             | -                            | -                            |
|                 |        | CXCR3–CCR4–CCR5+ | 0.54 ± 0.30   | 0.23 ± 0.13    | <b>0.037</b>                 | -                            | -                            |
|                 |        | CXCR3+CCR4–CCR5+ | 0.74 ± 0.52   | 5.99 ± 2.76    | <b>0.001</b>                 | -                            | -                            |
|                 |        | CXCR3+CCR4+CCR5– | 12.92 ± 6.00  | 39.14 ± 11.52  | <b>&lt;0.001</b>             | -                            | -                            |
|                 |        | CXCR3–CCR4+CCR5+ | 8.45 ± 5.05   | 1.35 ± 1.07    | <b>0.009</b>                 | -                            | -                            |
|                 |        | CXCR3+CCR4+CCR5+ | 8.56 ± 3.75   | 22.55 ± 8.32   | <b>0.002</b>                 | -                            | -                            |
|                 | MLN    | CXCR3–CCR4–CCR5– | 16.73 ± 3.58  | 20.90 ± 6.28   | 0.356                        | -                            | -                            |
|                 |        | CXCR3–CCR4+CCR5– | 54.49 ± 9.60  | 32.68 ± 1.11   | <b>0.006</b>                 | -                            | -                            |
|                 |        | CXCR3+CCR4–CCR5– | 1.21 ± 0.92   | 8.09 ± 1.83    | <b>0.002</b>                 | -                            | -                            |
|                 |        | CXCR3–CCR4–CCR5+ | 1.60 ± 1.51   | 1.38 ± 1.04    | 0.831                        | -                            | -                            |
|                 |        | CXCR3+CCR4–CCR5+ | 0.36 ± 0.15   | 3.35 ± 1.69    | <b>0.031</b>                 | -                            | -                            |
|                 |        | CXCR3+CCR4+CCR5– | 6.97 ± 3.19   | 19.67 ± 4.11   | <b>0.007</b>                 | -                            | -                            |
|                 |        | CXCR3–CCR4+CCR5+ | 15.64 ± 13.27 | 4.90 ± 4.29    | 0.180                        | -                            | -                            |
|                 |        | CXCR3+CCR4+CCR5+ | 3.00 ± 0.40   | 9.03 ± 1.53    | <b>0.001</b>                 | -                            | -                            |
| 60 days<br>p.i. | Blood  | CXCR3–CCR4–CCR5– | 14.27 ± 6.25  | 1.65 ± 2.54    | <b>0.001</b>                 | <b>0.027</b>                 | 0.186                        |
|                 |        | CXCR3–CCR4+CCR5– | 49.04 ± 13.55 | 17.38 ± 13.49  | <b>0.001</b>                 | 0.118                        | 0.785                        |
|                 |        | CXCR3+CCR4–CCR5– | 1.32 ± 0.54   | 1.92 ± 1.72    | 0.446                        | <b>0.002</b>                 | 0.718                        |
|                 |        | CXCR3–CCR4–CCR5+ | 0.88 ± 0.34   | 0.20 ± 0.17    | <b>0.001</b>                 | 0.913                        | 0.299                        |
|                 |        | CXCR3+CCR4–CCR5+ | 1.14 ± 1.16   | 1.89 ± 1.31    | 0.301                        | 0.174                        | <b>0.038</b>                 |
|                 |        | CXCR3+CCR4+CCR5– | 14.78 ± 6.25  | 47.23 ± 14.71  | <b>&lt;0.001</b>             | 0.678                        | <b>0.001</b>                 |
|                 |        | CXCR3–CCR4+CCR5+ | 5.34 ± 1.79   | 3.37 ± 3.05    | 0.176                        | <b>&lt;0.001</b>             | 0.285                        |
|                 |        | CXCR3+CCR4+CCR5+ | 13.22 ± 9.96  | 26.39 ± 16.57  | 0.104                        | 0.134                        | 0.059                        |
|                 | Spleen | CXCR3–CCR4–CCR5– | 15.63 ± 3.65  | 2.42 ± 3.47    | <b>&lt;0.001</b>             | <b>0.016</b>                 | 0.173                        |
|                 |        | CXCR3–CCR4+CCR5– | 47.66 ± 12.11 | 13.685 ± 16.84 | <b>0.002</b>                 | 0.154                        | 0.569                        |
|                 |        | CXCR3+CCR4–CCR5– | 2.79 ± 2.78   | 4.21 ± 3.04    | 0.417                        | 0.348                        | 0.157                        |
|                 |        | CXCR3–CCR4–CCR5+ | 0.57 ± 0.21   | 0.99 ± 1.77    | 0.576                        | 0.827                        | 0.341                        |
|                 |        | CXCR3+CCR4–CCR5+ | 1.21 ± 1.04   | 1.90 ± 1.52    | 0.383                        | 0.317                        | <b>0.007</b>                 |
|                 |        | CXCR3+CCR4+CCR5– | 15.52 ± 8.93  | 43.82 ± 25.80  | <b>0.029</b>                 | 0.544                        | 0.654                        |
|                 |        | CXCR3–CCR4+CCR5+ | 8.18 ± 5.19   | 6.92 ± 10.17   | 0.793                        | 0.925                        | 0.238                        |
|                 |        | CXCR3+CCR4+CCR5+ | 8.44 ± 3.33   | 26.07 ± 22.55  | 0.114                        | 0.953                        | 0.689                        |
|                 | MLN    | CXCR3–CCR4–CCR5– | 27.56 ± 7.06  | 19.37 ± 6.54   | 0.054                        | <b>0.014</b>                 | 0.722                        |
|                 |        | CXCR3–CCR4+CCR5– | 45.11 ± 8.27  | 33.44 ± 13.63  | 0.084                        | 0.154                        | 0.915                        |
|                 |        | CXCR3+CCR4–CCR5– | 1.52 ± 0.79   | 9.07 ± 7.83    | 0.065                        | 0.604                        | 0.816                        |
|                 |        | CXCR3–CCR4–CCR5+ | 2.03 ± 1.32   | 1.14 ± 0.84    | 0.183                        | 0.658                        | 0.692                        |
|                 |        | CXCR3+CCR4–CCR5+ | 0.53 ± 0.42   | 1.80 ± 0.85    | <b>0.005</b>                 | 0.525                        | 0.087                        |
|                 |        | CXCR3+CCR4+CCR5– | 5.30 ± 2.86   | 22.76 ± 5.92   | <b>&lt;0.001</b>             | 0.434                        | 0.393                        |
|                 |        | CXCR3–CCR4+CCR5+ | 13.38 ± 1.84  | 5.17 ± 2.47    | <b>&lt;0.001</b>             | 0.796                        | 0.914                        |
|                 |        | CXCR3+CCR4+CCR5+ | 4.57 ± 2.72   | 7.26 ± 3.15    | 0.126                        | 0.182                        | 0.334                        |

HTLV-1-infected and control HIS-NSG mice were euthanized at 30 days and 60 days post-inoculation (p.i.). Blood, spleen and mesenteric lymph nodes (MLN) were collected and the expression of CXCR3, CCR4 and CCR5 chemokine receptors was evaluated in CD4<sup>+</sup> human T- (CD45<sup>+</sup>CD3<sup>+</sup> mononuclear cells) by flow cytometry. Results are shown as the mean percentage ± standard deviation. Statistical analysis was performed with Student's *t*-test by pairwise comparisons, and an adjusted *p*-value was selected when equal variances were not assumed by Levene's test. *P*-value<0.05 was considered significant (in bold). <sup>a</sup> Control *versus* HTLV-1 infection. <sup>b</sup> 30 days p.i. (n=7) *versus* 60 days p.i. (n=7) groups of control HIS-NSG mice. <sup>c</sup> 30 days p.i. (n=8) *versus* 60 days p.i. (n=6) groups of HTLV-1-infected HIS-NSG mice.

**Table S3. Expression of chemokine receptors in CD8<sup>+</sup> T-cells.**

| Time            | Sample | Subsets          | Groups        |               | <i>p</i> -value <sup>a</sup> | <i>p</i> -value <sup>b</sup> | <i>p</i> -value <sup>c</sup> |
|-----------------|--------|------------------|---------------|---------------|------------------------------|------------------------------|------------------------------|
|                 |        |                  | Control       | HTLV-1        |                              |                              |                              |
| 30 days<br>p.i. | Blood  | CXCR3–CCR4–CCR5– | 7.13 ± 4.83   | 2.96 ± 2.53   | 0.071                        | -                            | -                            |
|                 |        | CXCR3–CCR4+CCR5– | 3.41 ± 1.53   | 0.94 ± 1.05   | <b>0.001</b>                 | -                            | -                            |
|                 |        | CXCR3+CCR4–CCR5– | 45.54 ± 14.87 | 16.42 ± 10.99 | <b>0.003</b>                 | -                            | -                            |
|                 |        | CXCR3–CCR4–CCR5+ | 0.80 ± 0.94   | 0.88 ± 1.15   | 0.885                        | -                            | -                            |
|                 |        | CXCR3+CCR4–CCR5+ | 7.74 ± 3.22   | 22.71 ± 9.31  | <b>0.001</b>                 | -                            | -                            |
|                 |        | CXCR3+CCR4+CCR5– | 21.70 ± 14.55 | 10.92 ± 2.71  | 0.099                        | -                            | -                            |
|                 |        | CXCR3–CCR4+CCR5+ | 1.02 ± 1.36   | 1.26 ± 1.70   | 0.770                        | -                            | -                            |
|                 |        | CXCR3+CCR4+CCR5+ | 12.67 ± 7.22  | 43.93 ± 18.88 | <b>0.001</b>                 | -                            | -                            |
|                 | Spleen | CXCR3–CCR4–CCR5– | 5.54 ± 3.94   | 2.39 ± 1.88   | 0.088                        | -                            | -                            |
|                 |        | CXCR3–CCR4+CCR5– | 2.31 ± 0.74   | 0.79 ± 0.40   | <b>&lt;0.001</b>             | -                            | -                            |
|                 |        | CXCR3+CCR4–CCR5– | 60.06 ± 11.54 | 39.94 ± 13.70 | <b>0.009</b>                 | -                            | -                            |
|                 |        | CXCR3–CCR4–CCR5+ | 0.76 ± 0.68   | 0.36 ± 0.16   | 0.128                        | -                            | -                            |
|                 |        | CXCR3+CCR4–CCR5+ | 5.92 ± 2.84   | 21.92 ± 9.99  | <b>0.002</b>                 | -                            | -                            |
|                 |        | CXCR3+CCR4+CCR5– | 16.20 ± 8.84  | 18.41 ± 8.24  | 0.625                        | -                            | -                            |
|                 |        | CXCR3–CCR4+CCR5+ | 1.05 ± 0.93   | 0.20 ± 0.09   | 0.052                        | -                            | -                            |
|                 |        | CXCR3+CCR4+CCR5+ | 8.16 ± 4.02   | 16.00 ± 8.81  | <b>0.050</b>                 | -                            | -                            |
|                 | MLN    | CXCR3–CCR4–CCR5– | 5.27 ± 6.27   | 4.75 ± 1.47   | 0.901                        | -                            | -                            |
|                 |        | CXCR3–CCR4+CCR5– | 1.83 ± 2.00   | 1.23 ± 0.77   | 0.594                        | -                            | -                            |
|                 |        | CXCR3+CCR4–CCR5– | 57.78 ± 18.69 | 51.82 ± 13.35 | 0.640                        | -                            | -                            |
|                 |        | CXCR3–CCR4–CCR5+ | 0.57 ± 0.66   | 0.39 ± 0.28   | 0.637                        | -                            | -                            |
|                 |        | CXCR3+CCR4–CCR5+ | 3.43 ± 1.27   | 9.56 ± 2.73   | <b>0.016</b>                 | -                            | -                            |
|                 |        | CXCR3+CCR4+CCR5– | 24.93 ± 13.04 | 20.40 ± 10.85 | 0.635                        | -                            | -                            |
|                 |        | CXCR3–CCR4+CCR5+ | 0.57 ± 0.51   | 0.26 ± 0.25   | 0.339                        | -                            | -                            |
|                 |        | CXCR3+CCR4+CCR5+ | 5.65 ± 1.13   | 11.59 ± 4.33  | 0.066                        | -                            | -                            |
| 60 days<br>p.i. | Blood  | CXCR3–CCR4–CCR5– | 6.35 ± 2.59   | 1.10 ± 1.26   | <b>0.001</b>                 | 0.716                        | 0.126                        |
|                 |        | CXCR3–CCR4+CCR5– | 3.23 ± 2.44   | 3.11 ± 3.14   | 0.940                        | 0.870                        | 0.089                        |
|                 |        | CXCR3+CCR4–CCR5– | 52.37 ± 18.81 | 17.37 ± 14.44 | <b>0.003</b>                 | 0.466                        | 0.891                        |
|                 |        | CXCR3–CCR4–CCR5+ | 0.46 ± 0.26   | 0.34 ± 0.37   | 0.525                        | 0.369                        | 0.294                        |
|                 |        | CXCR3+CCR4–CCR5+ | 7.18 ± 2.72   | 8.30 ± 3.72   | 0.543                        | 0.731                        | <b>0.004</b>                 |
|                 |        | CXCR3+CCR4+CCR5– | 15.20 ± 4.58  | 39.57 ± 16.22 | <b>0.013</b>                 | 0.282                        | <b>&lt;0.001</b>             |
|                 |        | CXCR3–CCR4+CCR5+ | 0.72 ± 0.81   | 0.97 ± 1.23   | 0.671                        | 0.626                        | 0.731                        |
|                 |        | CXCR3+CCR4+CCR5+ | 14.49 ± 13.92 | 29.26 ± 12.89 | 0.074                        | 0.765                        | 0.129                        |
|                 | Spleen | CXCR3–CCR4–CCR5– | 6.92 ± 2.79   | 1.38 ± 0.98   | <b>0.003</b>                 | 0.491                        | 0.259                        |
|                 |        | CXCR3–CCR4+CCR5– | 3.80 ± 3.15   | 1.84 ± 1.46   | 0.195                        | 0.304                        | 0.141                        |
|                 |        | CXCR3+CCR4–CCR5– | 57.99 ± 10.24 | 24.71 ± 16.04 | <b>0.002</b>                 | 0.741                        | 0.079                        |
|                 |        | CXCR3–CCR4–CCR5+ | 0.74 ± 0.25   | 1.08 ± 1.29   | 0.534                        | 0.941                        | 0.228                        |
|                 |        | CXCR3+CCR4–CCR5+ | 5.92 ± 1.97   | 15.42 ± 16.74 | 0.197                        | 0.996                        | 0.381                        |
|                 |        | CXCR3+CCR4+CCR5– | 16.84 ± 5.19  | 35.14 ± 21.81 | 0.073                        | 0.879                        | 0.068                        |
|                 |        | CXCR3–CCR4+CCR5+ | 0.90 ± 0.40   | 1.06 ± 1.21   | 0.763                        | 0.729                        | 0.142                        |
|                 |        | CXCR3+CCR4+CCR5+ | 6.91 ± 2.60   | 19.37 ± 13.96 | 0.057                        | 0.528                        | 0.618                        |
|                 | MLN    | CXCR3–CCR4–CCR5– | 11.40 ± 4.21  | 4.93 ± 2.55   | <b>0.007</b>                 | 0.102                        | 0.901                        |
|                 |        | CXCR3–CCR4+CCR5– | 2.57 ± 0.71   | 2.74 ± 1.42   | 0.787                        | 0.591                        | 0.091                        |
|                 |        | CXCR3+CCR4–CCR5– | 60.94 ± 10.45 | 49.22 ± 11.43 | 0.080                        | 0.734                        | 0.749                        |
|                 |        | CXCR3–CCR4–CCR5+ | 0.61 ± 0.70   | 0.50 ± 0.40   | 0.741                        | 0.928                        | 0.642                        |
|                 |        | CXCR3+CCR4–CCR5+ | 2.83 ± 2.17   | 5.61 ± 2.48   | 0.054                        | 0.673                        | <b>0.045</b>                 |
|                 |        | CXCR3+CCR4+CCR5– | 15.20 ± 7.73  | 27.57 ± 9.49  | <b>0.025</b>                 | 0.170                        | 0.300                        |
|                 |        | CXCR3–CCR4+CCR5+ | 0.60 ± 0.64   | 0.93 ± 1.13   | 0.524                        | 0.939                        | 0.287                        |
|                 |        | CXCR3+CCR4+CCR5+ | 5.84 ± 3.71   | 8.51 ± 4.92   | 0.289                        | 0.934                        | 0.341                        |

HTLV-1-infected and control HIS-NSG mice were euthanized at 30 days and 60 days post-inoculation (p.i.). Blood, spleen and mesenteric lymph nodes (MLN) were collected and the expression of CXCR3, CCR4 and CCR5 chemokine receptors was evaluated in CD8<sup>+</sup> human T- (CD45<sup>+</sup>CD3<sup>+</sup> mononuclear cells) by flow cytometry. Results are shown as the mean percentage ± standard deviation. Statistical analysis was performed with Student's *t*-test by pairwise comparisons, and an adjusted *p*-value was selected when equal variances were not assumed by Levene's test. *P*-value<0.05 was considered significant (in bold).

<sup>a</sup> Control *versus* HTLV-1 infection. <sup>b</sup> 30 days p.i. (n=7) *versus* 60 days p.i. (n=7) groups of control HIS-NSG mice. <sup>c</sup> 30 days p.i. (n=8) *versus* 60 days p.i.

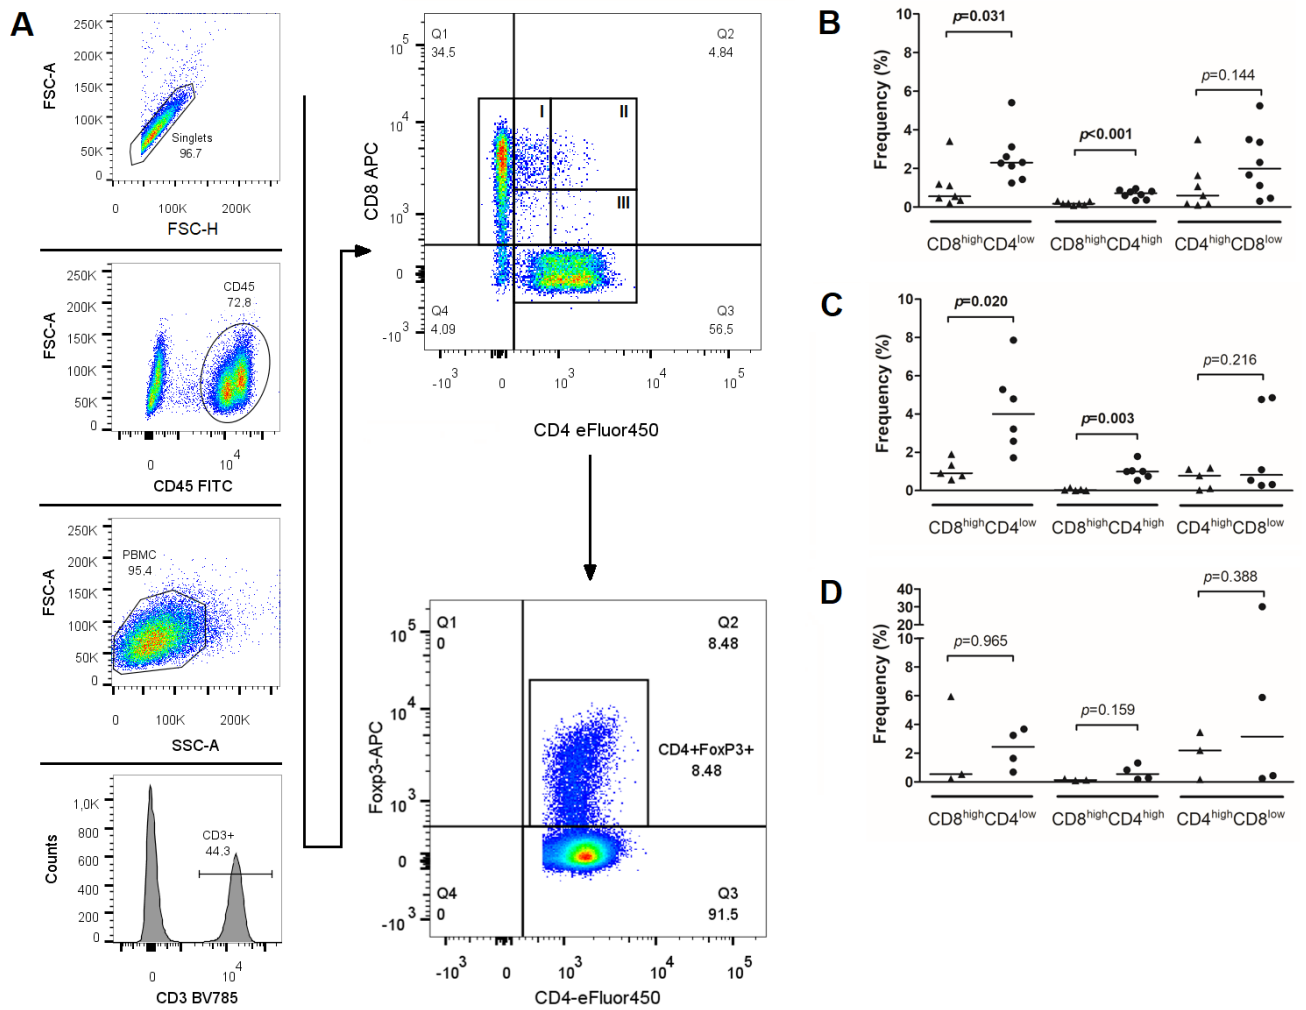

**Figure S1. Frequency of T-cell subsets.** HTLV-1-infected and mock-infected HIS-NSG mice were euthanized at 30 days and 60 days from inoculation, when blood, spleen and mesenteric lymph nodes (MLN) were collected. **(A)** Human leukocytes were stained with FITC-labeled anti-human CD45 monoclonal antibody and sorted by flow cytometry. After gating on CD45<sup>+</sup> cells, mononuclear cells were selected according to forward (FSC) and side scatter (SSC) properties. The frequency of T-cells (CD3<sup>+</sup> cells) was determined within CD45<sup>+</sup> mononuclear cells, while that of CD4<sup>+</sup>, CD8<sup>+</sup> and CD4<sup>+</sup>CD8<sup>+</sup> cells were defined within the gate of human T-cells (CD45<sup>+</sup>CD3<sup>+</sup>). The frequency of FoxP3<sup>+</sup> cells was determined within CD4<sup>+</sup> T-cells. CD4<sup>+</sup>CD8<sup>+</sup> double-positive T-cells were further divided into: (I) CD8<sup>high</sup>CD4<sup>low</sup>, (II) CD8<sup>high</sup>CD4<sup>high</sup>, and (III) CD4<sup>high</sup>CD8<sup>low</sup> according to the intensity of the fluorescence signal. The frequency of these subsets is shown as the percentage of T-cells in the **(B)** blood, **(C)** spleen and **(D)** MLN of mock-infected ( $\blacktriangle$ ) and HTLV-1-infected ( $\bullet$ ) HIS-NSG mice at 30 days from inoculation. Statistical analysis was performed with Student's *t*-test, and adjusted *p*-value was chosen when variances were not equal. *P*-value<0.05 was considered significant (in bold).

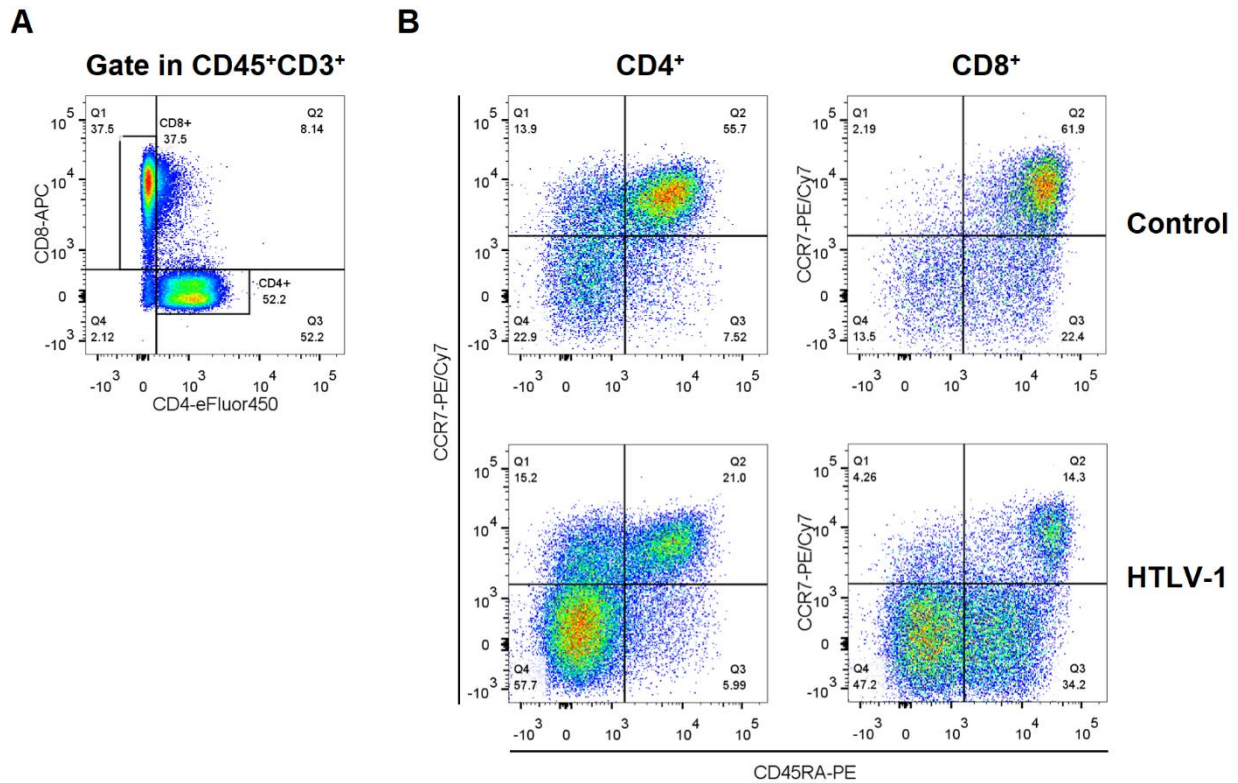

**Figure S2. Maturation of CD4<sup>+</sup> and CD8<sup>+</sup> T-cells.** HTLV-1-infected and control HIS-NSG mice were euthanized at 30 days and 60 days from inoculation. Blood, spleen and mesenteric lymph nodes (MLN) were collected, and the cells stained for flow cytometry analysis. (A) CD4<sup>+</sup> and CD8<sup>+</sup> T-cells were gated within human T-cells (CD45<sup>+</sup>CD3<sup>+</sup> cells), and (B) the expression of CD45RA and CCR7 was evaluated. Cells were divided into naïve (Q2: CD45RA<sup>+</sup>CCR7<sup>+</sup>), central memory (Q1: CD45RA<sup>-</sup>CCR7<sup>+</sup>), effector memory (Q4: CD45RA<sup>-</sup>CCR7<sup>-</sup>), and terminal effector (Q3: CD45RA<sup>+</sup>CCR7<sup>-</sup>) cells.

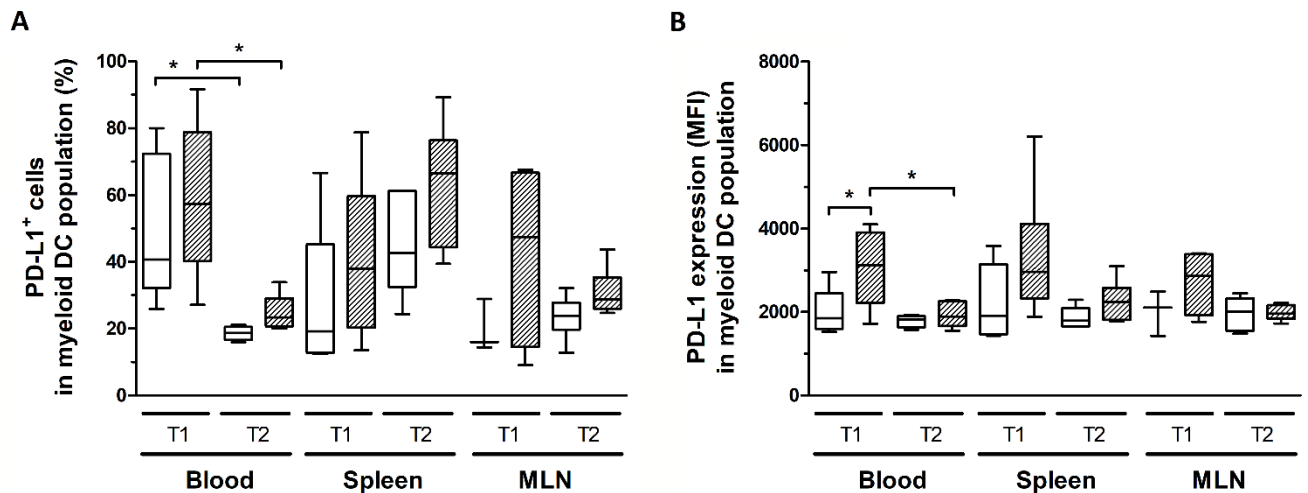

**Figure S3. Expression of PD-L1 in myeloid dendritic cells (mDCs).** Blood, spleen and mesenteric lymph nodes (MLN) from HTLV-1-infected (dashed box) and control HIS-NSG mice (white box) were collected at 30 days and 60 days from inoculation. (A) Frequency of PD-L1<sup>+</sup> mDCs, which were identified as HLA-DR<sup>+</sup>CD11c<sup>+</sup>CD14<sup>-</sup> cells within the gate of human CD45<sup>+</sup> cells. (B) Mean fluorescence intensity (MFI) values were determined in the population of PD-L1<sup>+</sup> mDCs. Statistical analysis was performed with Student's *t*-test (\*, *p*<0.05). Control groups 30d and 60d: n=7; HTLV-1-infected group 30d: n=8; HTLV-1-infected group 60d: n=6.
